# Supplementary material for: Exploring the Diversity of Arcobacter butzleri from Cattle in the UK Using MLST and Whole Genome Sequencing
Source: PLoS One. 2013 Feb 6;8(2):e55240. doi: 10.1371/journal.pone.0055240 (PMC3566208; doi:10.1371/journal.pone.0055240)
Supplement: Table S4 — A list of differences between 7h1h and RM4018 as predicted by the RAST program. (XLSX) [file pone.0055240.s004.xlsx]

## Sheet: Sheet1
Contig	Gene	Length	Gene id	function	Hit	Contig	Gene	Gene id	percent identity 367737.5	function
1	697	393	fig|28197.3.peg.697	Phage integrase	bi	1	1838	fig|367737.5.peg.1838	24.37	Integrase
1	698	108	fig|28197.3.peg.698	hypothetical protein	-				0
1	699	124	fig|28197.3.peg.699	hypothetical protein	-				0
1	700	395	fig|28197.3.peg.700	radical SAM domain protein	-				0
1	701	94	fig|28197.3.peg.701	hypothetical protein	-				0
1	702	423	fig|28197.3.peg.702	hypothetical protein	-				0
1	703	291	fig|28197.3.peg.703	hypothetical protein	-				0
1	704	155	fig|28197.3.peg.704	hypothetical protein	-				0
1	715	168	fig|28197.3.peg.715	possible reductase	uni	1	1508	fig|367737.5.peg.1508	43.33	possible reductase
1	744	146	fig|28197.3.peg.744	hypothetical protein	bi	1	110	fig|367737.5.peg.110	46.15	hypothetical protein
1	745	436	fig|28197.3.peg.745	hypothetical protein	uni	1	110	fig|367737.5.peg.110	33.33	hypothetical protein
1	746	256	fig|28197.3.peg.746	hypothetical protein	uni	1	109	fig|367737.5.peg.109	28	hypothetical protein
1	747	49	fig|28197.3.peg.747	hypothetical protein	bi	1	109	fig|367737.5.peg.109	66.67	hypothetical protein
1	774	268	fig|28197.3.peg.774	hypothetical protein	-				0
1	775	460	fig|28197.3.peg.775	hypothetical protein	-				0
1	815	33	fig|28197.3.peg.815	hypothetical protein	-				0
1	830	1208	fig|28197.3.peg.830	type II restriction-modification enzyme	uni	1	217	fig|367737.5.peg.217	23.15	N-6 DNA methylase
1	840	53	fig|28197.3.peg.840	COG0840: Methyl-accepting chemotaxis protein	-				0
1	845	2923	fig|28197.3.peg.845	outer membrane adhesin like proteiin	bi	1	17	fig|367737.5.peg.17	71.41	outer membrane adhesin like proteiin
1	877	238	fig|28197.3.peg.877	hypothetical protein	bi	1	2260	fig|367737.5.peg.2260	65.41	PAP2 superfamily protein
1	890	52	fig|28197.3.peg.890	hypothetical protein	-				0
1	891	109	fig|28197.3.peg.891	aliphatic sulfonates family ABC transporter, periplsmic ligand-binding protein	-				0
1	892	40	fig|28197.3.peg.892	hypothetical protein	-				0
1	893	106	fig|28197.3.peg.893	Alkanesulfonate monooxygenase (EC 1.14.14.5)	-				0
1	894	248	fig|28197.3.peg.894	Alkanesulfonate monooxygenase (EC 1.14.14.5)	-				0
1	895	262	fig|28197.3.peg.895	Alkanesulfonates transport system permease protein	uni	1	1948	fig|367737.5.peg.1948	26.07	Binding-protein-dependent transport systems inner membrane component
1	896	246	fig|28197.3.peg.896	Alkanesulfonates ABC transporter ATP-binding protein / Sulfonate ABC transporter, ATP-binding subunit SsuB	uni	1	2237	fig|367737.5.peg.2237	40.37	Sulfate and thiosulfate import ATP-binding protein CysA (EC 3.6.3.25)
1	897	285	fig|28197.3.peg.897	hypothetical protein	-				0
1	898	325	fig|28197.3.peg.898	Taurine transporter substrate-binding protein	-				0
1	899	254	fig|28197.3.peg.899	Taurine transport ATP-binding protein tauB	uni	1	1947	fig|367737.5.peg.1947	35.11	ABC transporter-related protein
1	900	226	fig|28197.3.peg.900	binding-protein-dependent transport systems inner membrane component	uni	1	1948	fig|367737.5.peg.1948	26.43	Binding-protein-dependent transport systems inner membrane component
1	901	406	fig|28197.3.peg.901	Threonine synthase (EC 4.2.3.1)	uni	1	1977	fig|367737.5.peg.1977	28.52	threonine dehydratase( EC:4.3.1.19 )
1	1216	402	fig|28197.3.peg.1216	transmembrane transport protein	uni	1	1177	fig|367737.5.peg.1177	23.74	fosmidomycin resistance protein
1	1217	147	fig|28197.3.peg.1217	transcriptional regulator, MarR family	uni	1	136	fig|367737.5.peg.136	25.4	transcriptional regulator, MarR family
1	41	43	fig|28197.3.peg.41	conserved hypothetical membrane protein	-				0
1	59	60	fig|28197.3.peg.59	cytochrome c biogenesis protein	-				0
1	75	35	fig|28197.3.peg.75	two-component sensor histidine kinase( EC:2.7.3.- )	-				0
1	553	229	fig|28197.3.peg.553	putative type II restriction endonuclease DpnI( EC:3.1.21.4 )	-				0
1	554	236	fig|28197.3.peg.554	hypothetical protein	-				0
1	579	37	fig|28197.3.peg.579	hypothetical protein	-				0
1	607	256	fig|28197.3.peg.607	hypothetical protein	bi	1	1577	fig|367737.5.peg.1577	26.02	hypothetical protein
1	608	105	fig|28197.3.peg.608	hypothetical protein	-				0
1	613	48	fig|28197.3.peg.613	hypothetical protein	-				0
1	628	132	fig|28197.3.peg.628	Sodium-dependent phosphate transporter	uni	1	1069	fig|367737.5.peg.1069	56	Sodium-dependent phosphate transporter
1	629	119	fig|28197.3.peg.629	Sodium-dependent phosphate transporter	uni	1	1069	fig|367737.5.peg.1069	45.76	Sodium-dependent phosphate transporter
1	630	265	fig|28197.3.peg.630	Sodium-dependent phosphate transporter	uni	1	1069	fig|367737.5.peg.1069	26.74	Sodium-dependent phosphate transporter
1	632	54	fig|28197.3.peg.632	hypothetical protein	-				0
1	633	40	fig|28197.3.peg.633	hypothetical protein	-				0
1	640	377	fig|28197.3.peg.640	hypothetical protein	bi	1	476	fig|367737.5.peg.476	78.09	hypothetical protein
1	649	224	fig|28197.3.peg.649	hypothetical protein	-				0
1	650	121	fig|28197.3.peg.650	hypothetical protein	-				0
1	651	179	fig|28197.3.peg.651	hypothetical protein	-				0
1	652	245	fig|28197.3.peg.652	hypothetical protein	-				0
1	653	139	fig|28197.3.peg.653	hypothetical protein	-				0
1	654	446	fig|28197.3.peg.654	hypothetical protein	uni	1	1498	fig|367737.5.peg.1498	41.67	hypothetical protein
1	655	137	fig|28197.3.peg.655	hypothetical protein	-				0
1	671	59	fig|28197.3.peg.671	sodium:solute symporter (Ssf family)	-				0
1	672	43	fig|28197.3.peg.672	hypothetical protein	-				0
1	909	291	fig|28197.3.peg.909	hypothetical protein	-				0
1	910	162	fig|28197.3.peg.910	hypothetical protein	-				0
1	911	94	fig|28197.3.peg.911	hypothetical protein	-				0
1	927	190	fig|28197.3.peg.927	hypothetical protein	-				0
1	928	449	fig|28197.3.peg.928	hypothetical protein	-				0
1	933	31	fig|28197.3.peg.933	hypothetical protein	-				0
1	948	184	fig|28197.3.peg.948	hypothetical protein	uni	1	1531	fig|367737.5.peg.1531	26.42	hypothetical protein
1	965	108	fig|28197.3.peg.965	plasmid stabilization system	-				0
1	966	91	fig|28197.3.peg.966	Antitoxin of toxin-antitoxin stability system	-				0
1	988	81	fig|28197.3.peg.988	response regulator	-				0
1	1033	194	fig|28197.3.peg.1033	UDP-N-acetylmuramoylalanyl-D-glutamate--2, 6-diaminopimelate ligase( EC:6.3.2.13 )	-				0
1	1035	342	fig|28197.3.peg.1035	NAD-dependent epimerase/dehydratase	bi	1	648	fig|367737.5.peg.648	65.54	PUTATIVE UDP-GLUCURONIC ACID EPIMERASE( EC:5.1.3.12 )
1	1036	297	fig|28197.3.peg.1036	Glucose-1-phosphate thymidylyltransferase (EC 2.7.7.24)	bi	1	1785	fig|367737.5.peg.1785	70.03	Glucose-1-phosphate thymidylyltransferase (EC 2.7.7.24)
1	1037	192	fig|28197.3.peg.1037	dTDP-4-dehydrorhamnose 3,5-epimerase (EC 5.1.3.13)	bi	1	682	fig|367737.5.peg.682	44.74	dTDP-4-dehydrorhamnose 3,5-epimerase (EC 5.1.3.13)
1	1038	293	fig|28197.3.peg.1038	dTDP-4-dehydrorhamnose reductase (EC 1.1.1.133)	-				0
1	1040	168	fig|28197.3.peg.1040	hypothetical protein	uni	1	826	fig|367737.5.peg.826	34.97	hypothetical protein
1	1041	276	fig|28197.3.peg.1041	hypothetical protein	-				0
1	1042	228	fig|28197.3.peg.1042	acylneuraminate cytidylyltransferase	-				0
1	1043	321	fig|28197.3.peg.1043	4-hydroxy-2-oxovalerate aldolase	uni	1	1465	fig|367737.5.peg.1465	21.58	4-hydroxy-2-oxovalerate aldolase (EC 4.1.3.-)
1	1044	152	fig|28197.3.peg.1044	3-deoxy-D-manno-octulosonate 8-phosphate phosphatase (EC 3.1.3.45)	uni	1	965	fig|367737.5.peg.965	36.11	3-deoxy-D-manno-octulosonate 8-phosphate phosphatase (EC 3.1.3.45)
1	1045	353	fig|28197.3.peg.1045	hypothetical protein	-				0
1	1046	185	fig|28197.3.peg.1046	Serine acetyltransferase (EC 2.3.1.30)	uni	1	950	fig|367737.5.peg.950	35.09	Serine acetyltransferase (EC 2.3.1.30)
1	1047	474	fig|28197.3.peg.1047	hypothetical protein	-				0
1	1048	45	fig|28197.3.peg.1048	hypothetical protein	-				0
1	1049	225	fig|28197.3.peg.1049	hypothetical protein	-				0
1	1050	117	fig|28197.3.peg.1050	hypothetical protein	-				0
1	1051	197	fig|28197.3.peg.1051	hypothetical protein	-				0
1	1052	313	fig|28197.3.peg.1052	hypothetical protein	-				0
1	1053	174	fig|28197.3.peg.1053	glycosyl transferase, group 1	uni	1	667	fig|367737.5.peg.667	23.9	Lipid carrier : UDP-N-acetylgalactosaminyltransferase (EC 2.4.1.-) / Alpha-1,3-N-acetylgalactosamine transferase PglA (EC 2.4.1.-); Putative glycosyltransferase
1	1054	420	fig|28197.3.peg.1054	hypothetical protein	-				0
1	1055	310	fig|28197.3.peg.1055	Alpha-L-Rha alpha-1,3-L-rhamnosyltransferase (EC 2.4.1.-)	uni	1	1779	fig|367737.5.peg.1779	24.78	glycosyl transferase family 2
1	1056	233	fig|28197.3.peg.1056	hypothetical protein	-				0
1	1057	140	fig|28197.3.peg.1057	hypothetical protein	-				0
1	1058	300	fig|28197.3.peg.1058	Alpha-L-Rha alpha-1,3-L-rhamnosyltransferase (EC 2.4.1.-)	-				0
1	1059	286	fig|28197.3.peg.1059	UDP-glucose 4-epimerase (EC 5.1.3.2)	uni	1	467	fig|367737.5.peg.467	24.51	hypothetical protein
1	1060	76	fig|28197.3.peg.1060	hypothetical protein	-				0
1	1061	112	fig|28197.3.peg.1061	Growth inhibitor	-				0
1	1096	672	fig|28197.3.peg.1096	TonB-dependent receptor	bi	1	715	fig|367737.5.peg.715	64.58	TonB-dependent receptor; Outer membrane receptor for ferrienterochelin and colicins
1	1114	352	fig|28197.3.peg.1114	hypothetical protein	uni	1	1383	fig|367737.5.peg.1383	23.26	hypothetical protein
1	1115	56	fig|28197.3.peg.1115	hypothetical protein	-				0
1	1128	149	fig|28197.3.peg.1128	hypothetical protein	-				0
1	1134	66	fig|28197.3.peg.1134	hypothetical protein	-				0
1	1135	196	fig|28197.3.peg.1135	hypothetical protein	bi	1	1533	fig|367737.5.peg.1533	64.47	putative DNA-binding protein
1	1141	138	fig|28197.3.peg.1141	transposase	-				0
1	1143	268	fig|28197.3.peg.1143	methyl-accepting chemotaxis protein	-				0
1	1151	142	fig|28197.3.peg.1151	hypothetical protein	-				0
1	1157	201	fig|28197.3.peg.1157	conserved hypothetical protein	bi	1	933	fig|367737.5.peg.933	35.71	conserved hypothetical protein
1	1292	243	fig|28197.3.peg.1292	hypothetical protein	-				0
1	1295	236	fig|28197.3.peg.1295	hypothetical protein	-				0
1	1296	106	fig|28197.3.peg.1296	hypothetical protein	uni	1	1823	fig|367737.5.peg.1823	45.54	hypothetical protein
1	1297	277	fig|28197.3.peg.1297	hypothetical protein	-				0
1	1298	93	fig|28197.3.peg.1298	hypothetical protein	-				0
1	1299	522	fig|28197.3.peg.1299	PepSY-associated TM helix domain protein	uni	1	1959	fig|367737.5.peg.1959	22.42	conserved hypothetical protein
1	1300	87	fig|28197.3.peg.1300	hypothetical protein	-				0
1	1301	76	fig|28197.3.peg.1301	hypothetical protein	-				0
1	1302	786	fig|28197.3.peg.1302	Ferrichrome-iron receptor	bi	1	972	fig|367737.5.peg.972	43.56	Ferrichrome-iron receptor
1	1326	63	fig|28197.3.peg.1326	transcriptional regulator, XRE family	-				0
1	1327	377	fig|28197.3.peg.1327	methyl-accepting chemotaxis protein	uni	1	831	fig|367737.5.peg.831	48.92	methyl-accepting chemotaxis protein
1	1328	137	fig|28197.3.peg.1328	Methyl-accepting chemotaxis protein	uni	1	832	fig|367737.5.peg.832	67.19	Signal transduction protein CetB, mediates an energy taxis response
1	1329	75	fig|28197.3.peg.1329	hypothetical protein	-				0
1	1330	477	fig|28197.3.peg.1330	sensor histidine kinase, PAS domain	uni	1	343	fig|367737.5.peg.343	41.7	diguanylate cyclase/phosphodiesterase (GGDEF & EAL domains)
1	1340	40	fig|28197.3.peg.1340	hypothetical protein	-				0
1	1341	65	fig|28197.3.peg.1341	hypothetical protein	-				0
1	1342	198	fig|28197.3.peg.1342	hypothetical protein	-				0
1	1343	89	fig|28197.3.peg.1343	RelB antitoxin	-				0
1	1344	90	fig|28197.3.peg.1344	hypothetical protein	-				0
1	1355	461	fig|28197.3.peg.1355	Probable poly(beta-D-mannuronate) O-acetylase (EC 2.3.1.-)	uni	1	1775	fig|367737.5.peg.1775	47.73	Probable poly(beta-D-mannuronate) O-acetylase (EC 2.3.1.-)
1	1356	331	fig|28197.3.peg.1356	hypothetical protein	-				0
1	1365	170	fig|28197.3.peg.1365	hypothetical protein	-				0
1	1366	82	fig|28197.3.peg.1366	putative membrane protein	-				0
1	1367	61	fig|28197.3.peg.1367	hypothetical protein	-				0
1	1372	122	fig|28197.3.peg.1372	Putative translation initiation inhibitor	uni	1	1967	fig|367737.5.peg.1967	32.47	Endoribonuclease L-PSP
1	1384	220	fig|28197.3.peg.1384	two-component response regulator	bi	1	889	fig|367737.5.peg.889	77.63	two component transcriptional regulator, winged helix family
1	1385	308	fig|28197.3.peg.1385	hypothetical protein	bi	1	888	fig|367737.5.peg.888	59.09	hypothetical protein
1	1387	953	fig|28197.3.peg.1387	Type I restriction-modification system, restriction subunit R (EC 3.1.21.3)	uni	1	173	fig|367737.5.peg.173	20.26	helicase, putative
1	1388	376	fig|28197.3.peg.1388	hypothetical protein	-				0
1	1389	48	fig|28197.3.peg.1389	hypothetical protein	-				0
1	1390	215	fig|28197.3.peg.1390	type I restriction enzyme (specificity chain) homolog	-				0
1	1391	185	fig|28197.3.peg.1391	hypothetical protein	-				0
1	1392	331	fig|28197.3.peg.1392	Putative DNA-binding protein in cluster with Type I restriction-modification system	bi	1	219	fig|367737.5.peg.219	46.28	Putative DNA-binding protein in cluster with Type I restriction-modification system
1	1393	63	fig|28197.3.peg.1393	Type I restriction-modification system, DNA-methyltransferase subunit M (EC 2.1.1.72)	-				0
1	1394	444	fig|28197.3.peg.1394	Type I restriction-modification system, DNA-methyltransferase subunit M (EC 2.1.1.72)	bi	1	217	fig|367737.5.peg.217	29.77	N-6 DNA methylase
1	1432	303	fig|28197.3.peg.1432	hypothetical protein	-				0
1	1433	76	fig|28197.3.peg.1433	hypothetical protein	-				0
1	1434	51	fig|28197.3.peg.1434	hypothetical protein	-				0
1	1435	274	fig|28197.3.peg.1435	hypothetical protein	-				0
1	1436	204	fig|28197.3.peg.1436	hypothetical protein	-				0
1	1437	241	fig|28197.3.peg.1437	hypothetical protein	-				0
1	1438	53	fig|28197.3.peg.1438	hypothetical protein	-				0
1	1439	110	fig|28197.3.peg.1439	hypothetical protein	-				0
1	1440	54	fig|28197.3.peg.1440	hypothetical protein	-				0
1	1441	72	fig|28197.3.peg.1441	hypothetical protein	-				0
1	1442	284	fig|28197.3.peg.1442	hypothetical protein	-				0
1	1443	243	fig|28197.3.peg.1443	putative type I restriction-modification system, M subunit	bi	1	1692	fig|367737.5.peg.1692	23.02	Type I restriction-modification system, M subunit, putative( EC:2.1.1.72 )
1	1444	391	fig|28197.3.peg.1444	hypothetical protein	-				0
1	1445	153	fig|28197.3.peg.1445	hypothetical protein	-				0
1	1446	602	fig|28197.3.peg.1446	hypothetical protein	bi	1	1315	fig|367737.5.peg.1315	27.03	hypothetical protein
1	1447	283	fig|28197.3.peg.1447	filamentation induced by cAMP protein Fic	uni	1	1059	fig|367737.5.peg.1059	29.63	MloA protein, putative
1	1450	85	fig|28197.3.peg.1450	transcriptional regulator, XRE family	uni	1	1126	fig|367737.5.peg.1126	41.98	hypothetical protein
1	1451	134	fig|28197.3.peg.1451	hypothetical protein	-				0
1	1452	302	fig|28197.3.peg.1452	hypothetical protein	-				0
1	1453	561	fig|28197.3.peg.1453	hypothetical protein	-				0
1	1454	342	fig|28197.3.peg.1454	hypothetical protein	bi	1	1059	fig|367737.5.peg.1059	30.5	MloA protein, putative
1	1455	55	fig|28197.3.peg.1455	hypothetical protein	-				0
1	1456	261	fig|28197.3.peg.1456	hypothetical protein	-				0
1	1457	433	fig|28197.3.peg.1457	HYPOTHETICAL PROTEIN-PUTATIVE INTEGRASE	uni	1	1682	fig|367737.5.peg.1682	22.9	site-specific recombinase, phage integrase family
1	1480	74	fig|28197.3.peg.1480	hypothetical protein	-				0
1	1501	101	fig|28197.3.peg.1501	hypothetical protein	bi	1	1032	fig|367737.5.peg.1032	70.45	membrane protein
1	1506	294	fig|28197.3.peg.1506	membrane protein	bi	1	1037	fig|367737.5.peg.1037	64.85	membrane protein
1	1507	271	fig|28197.3.peg.1507	oxidoreductase, aldo/keto reductase family	-				0
1	1512	277	fig|28197.3.peg.1512	Phosphonate ABC transporter phosphate-binding periplasmic component (TC 3.A.1.9.1)	-				0
1	1513	376	fig|28197.3.peg.1513	PUTATIVE ACYL-CoA DEHYDROGENASE	-				0
1	1514	417	fig|28197.3.peg.1514	hypothetical protein	-				0
1	1559	223	fig|28197.3.peg.1559	hypothetical protein	-				0
1	1560	135	fig|28197.3.peg.1560	Probable poly(beta-D-mannuronate) O-acetylase (EC 2.3.1.-)	bi	1	1775	fig|367737.5.peg.1775	58.21	Probable poly(beta-D-mannuronate) O-acetylase (EC 2.3.1.-)
1	1576	155	fig|28197.3.peg.1576	hypothetical protein	-				0
1	1610	530	fig|28197.3.peg.1610	HipA-like-like	uni	1	1252	fig|367737.5.peg.1252	22.25	DNA polymerase I (EC 2.7.7.7)
1	1613	500	fig|28197.3.peg.1613	hypothetical protein	-				0
1	1614	261	fig|28197.3.peg.1614	hypothetical protein	-				0
1	1615	692	fig|28197.3.peg.1615	hypothetical protein	-				0
1	1616	98	fig|28197.3.peg.1616	hypothetical protein	-				0
1	1617	419	fig|28197.3.peg.1617	Exonuclease SbcC	uni	1	1561	fig|367737.5.peg.1561	25.87	TPR repeat containing exported protein; Putative periplasmic protein contains a protein prenylyltransferase domain
1	1618	781	fig|28197.3.peg.1618	Exonuclease SbcC	uni	1	2270	fig|367737.5.peg.2270	26.46	RESPONSE REGULATOR PROTEIN-CheY-like nd an HD-GYP domain
1	1621	441	fig|28197.3.peg.1621	Membrane-fusion protein	uni	1	1110	fig|367737.5.peg.1110	23.92	HlyD family secretion protein
1	1622	714	fig|28197.3.peg.1622	Leukotoxin translocation ATP-binding protein lktB	uni	1	1109	fig|367737.5.peg.1109	30.65	ABC transporter, transmembrane region:ABC transporter:Peptidase C39, bacteriocin processing
1	1623	426	fig|28197.3.peg.1623	Outer membrane efflux protein	uni	1	1833	fig|367737.5.peg.1833	22.81	hypothetical protein
1	1624	147	fig|28197.3.peg.1624	RTX toxin activating acyltransferase	-				0
1	1625	733	fig|28197.3.peg.1625	calcium binding hemolysin protein, putative	uni	1	2123	fig|367737.5.peg.2123	23.25	hypothetical membrane protein
1	1626	1562	fig|28197.3.peg.1626	Hemolysin-type calcium-binding region	uni	1	2123	fig|367737.5.peg.2123	22.35	hypothetical membrane protein
1	1627	751	fig|28197.3.peg.1627	hypothetical protein	-				0
1	1628	271	fig|28197.3.peg.1628	hypothetical protein	uni	1	738	fig|367737.5.peg.738	27.46	hypothetical protein
1	1629	215	fig|28197.3.peg.1629	hypothetical protein	uni	1	1156	fig|367737.5.peg.1156	27.54	hypothetical protein
1	1630	207	fig|28197.3.peg.1630	hypothetical protein	bi	1	1157	fig|367737.5.peg.1157	53.33	hypothetical protein
1	1632	163	fig|28197.3.peg.1632	hypothetical protein	-				0
1	1633	218	fig|28197.3.peg.1633	hypothetical protein	-				0
1	1634	304	fig|28197.3.peg.1634	probable transcription regulator Cj0571	-				0
1	1697	620	fig|28197.3.peg.1697	TonB-dependent receptor	uni	1	1944	fig|367737.5.peg.1944	26.99	TonB-dependent receptor; Outer membrane receptor for ferrienterochelin and colicins
1	1714	41	fig|28197.3.peg.1714	hypothetical protein	-				0
1	1720	123	fig|28197.3.peg.1720	hypothetical protein	uni	1	738	fig|367737.5.peg.738	35	hypothetical protein
1	1721	216	fig|28197.3.peg.1721	hypothetical protein	bi	1	738	fig|367737.5.peg.738	47.32	hypothetical protein
1	1732	698	fig|28197.3.peg.1732	TonB-dependent siderophore receptor	uni	1	321	fig|367737.5.peg.321	26.68	Ferrichrome-iron receptor
1	1754	56	fig|28197.3.peg.1754	hypothetical protein	-				0
1	1780	171	fig|28197.3.peg.1780	methyl-accepting chemotaxis protein	-				0
1	1825	131	fig|28197.3.peg.1825	hypothetical protein	-				0
1	1826	102	fig|28197.3.peg.1826	hypothetical protein	-				0
1	1827	406	fig|28197.3.peg.1827	IncQ plasmid conjugative transfer DNA nicking endonuclease TraR (pTi VirD2 homolog)	-				0
1	1828	95	fig|28197.3.peg.1828	hypothetical protein	-				0
1	1829	171	fig|28197.3.peg.1829	hypothetical protein	-				0
1	1830	310	fig|28197.3.peg.1830	Integral inner membrane protein of type IV secretion complex (VirB6)	-				0
1	1831	75	fig|28197.3.peg.1831	hypothetical protein	-				0
1	1832	252	fig|28197.3.peg.1832	Minor pilin of type IV secretion complex (VirB5)	-				0
1	1833	83	fig|28197.3.peg.1833	hypothetical protein	-				0
1	1834	94	fig|28197.3.peg.1834	hypothetical protein	-				0
1	1835	200	fig|28197.3.peg.1835	hypothetical protein	-				0
1	1836	80	fig|28197.3.peg.1836	hypothetical protein	bi	1	1329	fig|367737.5.peg.1329	28.17	hypothetical protein
1	1837	245	fig|28197.3.peg.1837	hypothetical protein	bi	1	1332	fig|367737.5.peg.1332	28.66	hypothetical protein
1	1838	730	fig|28197.3.peg.1838	putative two-component system sensor histidine kinase, putative heat shock protein	-				0
1	1839	430	fig|28197.3.peg.1839	hypothetical protein	-				0
1	1840	664	fig|28197.3.peg.1840	McrBC restriction endonuclease system, McrB subunit, putative	bi	1	1382	fig|367737.5.peg.1382	51.36	McrBC restriction endonuclease system, McrB subunit, putative
1	1841	391	fig|28197.3.peg.1841	hypothetical protein	bi	1	1383	fig|367737.5.peg.1383	56.41	hypothetical protein
1	1842	536	fig|28197.3.peg.1842	DNA-cytosine methyltransferase	bi	1	1457	fig|367737.5.peg.1457	23.59	DNA (cytosine-5-)-methyltransferase( EC:2.1.1.37 )
1	1843	41	fig|28197.3.peg.1843	hypothetical protein	-				0
1	1844	84	fig|28197.3.peg.1844	hypothetical protein	-				0
1	1845	95	fig|28197.3.peg.1845	hypothetical protein	bi	1	1365	fig|367737.5.peg.1365	28.57	hypothetical protein
1	1846	528	fig|28197.3.peg.1846	hypothetical protein	-				0
1	1847	363	fig|28197.3.peg.1847	site-specific recombinase, phage integrase family	bi	1	1682	fig|367737.5.peg.1682	44.19	site-specific recombinase, phage integrase family
1	1848	1034	fig|28197.3.peg.1848	hypothetical protein	uni	1	359	fig|367737.5.peg.359	24.64	hypothetical protein
1	1850	100	fig|28197.3.peg.1850	hypothetical protein	-				0
1	1870	361	fig|28197.3.peg.1870	Integrase	uni	1	1682	fig|367737.5.peg.1682	25.65	site-specific recombinase, phage integrase family
1	1871	297	fig|28197.3.peg.1871	hypothetical protein	-				0
1	1872	422	fig|28197.3.peg.1872	ATPase	uni	1	110	fig|367737.5.peg.110	25	hypothetical protein
1	1873	38	fig|28197.3.peg.1873	hypothetical protein	-				0
1	1874	65	fig|28197.3.peg.1874	hypothetical protein	-				0
1	1875	538	fig|28197.3.peg.1875	hypothetical protein	uni	1	400	fig|367737.5.peg.400	33.03	hypothetical protein
1	1876	257	fig|28197.3.peg.1876	hypothetical protein	-				0
1	1877	1036	fig|28197.3.peg.1877	IncF plasmid conjugative transfer protein TraG	-				0
1	1878	55	fig|28197.3.peg.1878	hypothetical protein	-				0
1	1879	51	fig|28197.3.peg.1879	hypothetical protein	-				0
1	1880	136	fig|28197.3.peg.1880	hypothetical protein	-				0
1	1881	126	fig|28197.3.peg.1881	hypothetical protein	-				0
1	1882	83	fig|28197.3.peg.1882	hypothetical protein	-				0
1	1883	43	fig|28197.3.peg.1883	hypothetical protein	-				0
1	1884	186	fig|28197.3.peg.1884	hypothetical protein	-				0
1	1885	89	fig|28197.3.peg.1885	hypothetical protein	-				0
1	1886	142	fig|28197.3.peg.1886	hypothetical protein	-				0
1	1887	91	fig|28197.3.peg.1887	hypothetical protein	bi	1	1684	fig|367737.5.peg.1684	40	hypothetical protein
1	1888	90	fig|28197.3.peg.1888	hypothetical protein	-				0
1	1923	171	fig|28197.3.peg.1923	methyl-accepting chemotaxis protein	-				0
1	1925	265	fig|28197.3.peg.1925	hypothetical protein	-				0
1	1927	109	fig|28197.3.peg.1927	Quaternary ammonium compound-resistance protein sugE	uni	1	1036	fig|367737.5.peg.1036	43.69	Quaternary ammonium compound-resistance protein sugE
1	1928	134	fig|28197.3.peg.1928	Allophanate hydrolase	-				0
1	1929	443	fig|28197.3.peg.1929	Amidase	uni	1	1009	fig|367737.5.peg.1009	29.73	Aspartyl-tRNA(Asn) amidotransferase subunit A (EC 6.3.5.-) @ Glutamyl-tRNA(Gln) amidotransferase subunit A (EC 6.3.5.-)
1	1930	1199	fig|28197.3.peg.1930	Urea carboxylase (EC 6.3.4.6)	uni	1	592	fig|367737.5.peg.592	43.08	Pyruvate carboxyl transferase subunit A (EC 6.4.1.1)
1	1931	207	fig|28197.3.peg.1931	Urea carboxylase-related aminomethyltransferase (EC 2.1.2.10)	-				0
1	1932	241	fig|28197.3.peg.1932	Urea carboxylase-related aminomethyltransferase (EC 2.1.2.10)	-				0
1	1933	246	fig|28197.3.peg.1933	Urea carboxylase-related ABC transporter, ATPase protein	uni	1	2237	fig|367737.5.peg.2237	38.12	Sulfate and thiosulfate import ATP-binding protein CysA (EC 3.6.3.25)
1	1934	271	fig|28197.3.peg.1934	Urea carboxylase-related ABC transporter, permease protein	uni	1	1948	fig|367737.5.peg.1948	22.68	Binding-protein-dependent transport systems inner membrane component
1	1935	359	fig|28197.3.peg.1935	Urea carboxylase-related ABC transporter, periplasmic substrate-binding protein	-				0
1	1975	778	fig|28197.3.peg.1975	Outer membrane receptor for ferric coprogen and ferric-rhodotorulic acid	uni	1	1829	fig|367737.5.peg.1829	59.27	Outer membrane receptor for ferric coprogen and ferric-rhodotorulic acid
1	1996	41	fig|28197.3.peg.1996	hypothetical protein	uni	1	1451	fig|367737.5.peg.1451	78.12	glutamine amidotransferase class-I
1	2002	648	fig|28197.3.peg.2002	hypothetical protein	uni	1	110	fig|367737.5.peg.110	30.98	hypothetical protein
1	2003	144	fig|28197.3.peg.2003	hypothetical protein	-				0
1	2004	117	fig|28197.3.peg.2004	hypothetical protein	uni	1	109	fig|367737.5.peg.109	32.76	hypothetical protein
1	2005	408	fig|28197.3.peg.2005	hypothetical protein	-				0
1	2014	282	fig|28197.3.peg.2014	hypothetical protein	-				0
1	2067	139	fig|28197.3.peg.2067	conserved hypothetical protein	-				0
1	2068	219	fig|28197.3.peg.2068	conserved hypothetical protein	-				0
1	2069	134	fig|28197.3.peg.2069	Probable poly(beta-D-mannuronate) O-acetylase (EC 2.3.1.-)	uni	1	1775	fig|367737.5.peg.1775	54.14	Probable poly(beta-D-mannuronate) O-acetylase (EC 2.3.1.-)
1	2109	107	fig|28197.3.peg.2109	hypothetical protein	-				0
1	2110	423	fig|28197.3.peg.2110	hypothetical protein	bi	1	1534	fig|367737.5.peg.1534	53.49	hypothetical protein
1	2121	198	fig|28197.3.peg.2121	hypothetical protein	-				0
1	2122	319	fig|28197.3.peg.2122	hypothetical protein	-				0
1	2123	521	fig|28197.3.peg.2123	hypothetical protein	uni	1	1518	fig|367737.5.peg.1518	30.19	Chaperone protein HtpG
1	2125	674	fig|28197.3.peg.2125	TonB-dependent receptor	uni	1	333	fig|367737.5.peg.333	53.06	TonB-dependent receptor protein
1	2182	39	fig|28197.3.peg.2182	hypothetical protein	-				0
1	2184	56	fig|28197.3.peg.2184	hypothetical protein	-				0
1	2185	43	fig|28197.3.peg.2185	hypothetical protein	-				0
1	2214	39	fig|28197.3.peg.2214	two-component sensor histidine kinase( EC:2.7.3.- )	-				0
1	2229	134	fig|28197.3.peg.2229	Signal transduction protein CetB, mediates an energy taxis response	uni	1	947	fig|367737.5.peg.947	74.05	Methyl-accepting chemotaxis protein
1	2230	596	fig|28197.3.peg.2230	hypothetical protein	uni	1	831	fig|367737.5.peg.831	49.07	methyl-accepting chemotaxis protein
1	2302	198	fig|28197.3.peg.2302	hypothetical protein	bi	1	1780	fig|367737.5.peg.1780	49.58	hypothetical protein
1	2303	199	fig|28197.3.peg.2303	hypothetical protein	uni	1	1780	fig|367737.5.peg.1780	37.19	hypothetical protein
1	2305	367	fig|28197.3.peg.2305	LOS biosynthesis enzyme LBGB	uni	1	1791	fig|367737.5.peg.1791	24.65	Lipopolysaccharide heptosyltransferase I (EC 2.4.1.-)
1	2308	226	fig|28197.3.peg.2308	N-Acetylneuraminate cytidylyltransferase (EC 2.7.7.43)	uni	1	2190	fig|367737.5.peg.2190	36.53	acylneuraminate cytidylyltransferase
1	2309	377	fig|28197.3.peg.2309	UDP-N-acetylglucosamine 2-epimerase (EC 5.1.3.14)	bi	1	679	fig|367737.5.peg.679	24.03	UDP-N-acetylglucosamine 2-epimerase (EC 5.1.3.14)
1	2310	346	fig|28197.3.peg.2310	N-acetylneuraminate synthase (EC 2.5.1.56)	uni	1	2191	fig|367737.5.peg.2191	31.78	N-acetylneuraminate synthase (EC 2.5.1.56)
1	2311	43	fig|28197.3.peg.2311	hypothetical protein	-				0
1	2312	416	fig|28197.3.peg.2312	O-antigen polymerase	bi	1	1782	fig|367737.5.peg.1782	23.88	O-antigen polymerase
1	2313	358	fig|28197.3.peg.2313	putative glycosyltransferase	bi	1	1778	fig|367737.5.peg.1778	36.44	a-glycosyltransferase, glycosyltransferase family 4 protein
1	2314	418	fig|28197.3.peg.2314	Hypothetical protein FIG015671 in large core OS assembly cluster	-				0
1	2315	327	fig|28197.3.peg.2315	hypothetical protein	-				0
1	2319	70	fig|28197.3.peg.2319	phosphoglycerol transferase	-				0
1	2321	192	fig|28197.3.peg.2321	hypothetical protein	bi	1	1789	fig|367737.5.peg.1789	68.59	hypothetical protein
1	2347	340	fig|28197.3.peg.2347	hypothetical protein	uni	1	147	fig|367737.5.peg.147	32.94	hypothetical protein
1	156	226	fig|28197.3.peg.156	Flagellar basal-body rod modification protein FlgD	bi	1	1911	fig|367737.5.peg.1911	74.67	Flagellar hook capping protein
1	158	864	fig|28197.3.peg.158	Flagellar hook protein flgE	bi	1	1909	fig|367737.5.peg.1909	75.2	flagellar hook protein FlgE
1	182	382	fig|28197.3.peg.182	Chromate transport protein ChrA	-				0
1	183	320	fig|28197.3.peg.183	permease	bi	1	1885	fig|367737.5.peg.1885	73.83	hypothetical protein
1	187	143	fig|28197.3.peg.187	Large-conductance mechanosensitive channel	-				0
1	189	78	fig|28197.3.peg.189	methyl-accepting chemotaxis protein	-				0
1	209	691	fig|28197.3.peg.209	Ferrichrome-iron receptor	bi	1	1957	fig|367737.5.peg.1957	73.2	Ferrichrome-iron receptor
1	233	412	fig|28197.3.peg.233	Major outer membrane protein	bi	1	1980	fig|367737.5.peg.1980	60.91	Major outer membrane protein
1	247	89	fig|28197.3.peg.247	translation initiation factor IF-2	-				0
1	270	132	fig|28197.3.peg.270	hypothetical protein	-				0
1	284	226	fig|28197.3.peg.284	hypothetical protein	-				0
1	285	92	fig|28197.3.peg.285	hypothetical protein	-				0
1	286	85	fig|28197.3.peg.286	prevent-host-death family protein	-				0
1	290	401	fig|28197.3.peg.290	Putative AAA+ superfamily ATPase	-				0
1	301	59	fig|28197.3.peg.301	hypothetical protein	-				0
1	327	39	fig|28197.3.peg.327	hypothetical protein	-				0
1	340	43	fig|28197.3.peg.340	hypothetical protein	-				0
1	341	58	fig|28197.3.peg.341	hypothetical protein	-				0
1	373	48	fig|28197.3.peg.373	conserved hypothetical protein	bi	1	2020	fig|367737.5.peg.2020	78.72	biphenyl-2,3-diol 1,2-dioxygenase III-related protein
1	374	1210	fig|28197.3.peg.374	hypothetical protein	bi	1	2123	fig|367737.5.peg.2123	69.36	hypothetical membrane protein
1	414	58	fig|28197.3.peg.414	hypothetical protein	-				0
1	415	311	fig|28197.3.peg.415	hypothetical protein	-				0
1	416	324	fig|28197.3.peg.416	hypothetical protein	uni	1	109	fig|367737.5.peg.109	38.64	hypothetical protein
1	417	939	fig|28197.3.peg.417	hypothetical protein	uni	1	110	fig|367737.5.peg.110	25.77	hypothetical protein
1	418	224	fig|28197.3.peg.418	hypothetical protein	-				0
1	419	629	fig|28197.3.peg.419	TniA putative transposase	bi	1	1665	fig|367737.5.peg.1665	21.24	prophage MuMc02, transposase protein A, putative
1	420	290	fig|28197.3.peg.420	TniB NTP-binding protein	-				0
1	421	390	fig|28197.3.peg.421	Mll9366 protein	-				0
1	422	222	fig|28197.3.peg.422	hypothetical protein	-				0
1	423	713	fig|28197.3.peg.423	type I restriction-modification system, M subunit, putative	-				0
1	424	262	fig|28197.3.peg.424	type I restriction-modification system, M subunit, putative	-				0
1	425	289	fig|28197.3.peg.425	probable transcription regulator Cj0571	-				0
1	426	41	fig|28197.3.peg.426	hypothetical protein	-				0
1	427	299	fig|28197.3.peg.427	hypothetical protein	-				0
1	439	273	fig|28197.3.peg.439	hypothetical protein	-				0
1	440	527	fig|28197.3.peg.440	hypothetical protein	-				0
1	441	506	fig|28197.3.peg.441	OmpA family protein	uni	1	1108	fig|367737.5.peg.1108	35.19	hypothetical protein
1	465	34	fig|28197.3.peg.465	hypothetical protein	-				0
1	466	37	fig|28197.3.peg.466	hypothetical protein	-				0
1	473	310	fig|28197.3.peg.473	UDP-6-deoxy-AltdiNAc hydrolase (PseG, third step of pseudaminic acid biosynthesis)	bi	1	2192	fig|367737.5.peg.2192	28.08	glycosyltransferase
1	475	80	fig|28197.3.peg.475	hypothetical protein	-				0
1	476	97	fig|28197.3.peg.476	hypothetical protein	-				0
1	477	97	fig|28197.3.peg.477	hypothetical protein	-				0
1	478	234	fig|28197.3.peg.478	hypothetical protein	uni	1	884	fig|367737.5.peg.884	28.92	short-chain dehydrogenase/reductase
1	479	446	fig|28197.3.peg.479	hypothetical protein	uni	1	185	fig|367737.5.peg.185	26.19	Putative 2-acylglycerophosphoethanolamine acyltransferase / acyl-acyl carrier protein synthetase (EC 6.2.1.20)
1	480	463	fig|28197.3.peg.480	Putative polyribitolphosphotransferase	-				0
1	481	455	fig|28197.3.peg.481	2-C-methyl-D-erythritol 4-phosphate cytidylyltransferase (EC 2.7.7.60)	uni	1	1196	fig|367737.5.peg.1196	25.11	Oxidoreductase, short-chain dehydrogenase/reductase family (EC 1.1.1.-)
1	482	226	fig|28197.3.peg.482	hypothetical protein	-				0
1	483	171	fig|28197.3.peg.483	Beta-1,3-galactosyltransferase / Beta-1,4-galactosyltransferase	bi	1	1779	fig|367737.5.peg.1779	36.05	glycosyl transferase family 2
1	484	293	fig|28197.3.peg.484	glycosyltransferase/CDP- glycerol:poly(glycerophosphate) glycerophosphotransferase, GT2 family	bi	1	680	fig|367737.5.peg.680	34.83	glycosyl transferase
1	485	30	fig|28197.3.peg.485	hypothetical protein	-				0
1	486	230	fig|28197.3.peg.486	hypothetical protein	-				0
1	487	256	fig|28197.3.peg.487	hypothetical protein	-				0
1	488	266	fig|28197.3.peg.488	methyltransferase FkbM family	-				0
1	489	314	fig|28197.3.peg.489	hypothetical protein	-				0
1	490	214	fig|28197.3.peg.490	Methyltransferase type 12	-				0
1	491	220	fig|28197.3.peg.491	transferase, putative	uni	1	657	fig|367737.5.peg.657	30.77	acetyltransferase, putative
1	492	230	fig|28197.3.peg.492	hypothetical protein	-				0
1	493	358	fig|28197.3.peg.493	sugar transamine/perosamine synthetase	bi	1	1783	fig|367737.5.peg.1783	73.11	sugar transamine/perosamine synthetase
1	494	343	fig|28197.3.peg.494	hypothetical protein	-				0
1	495	341	fig|28197.3.peg.495	hypothetical protein	uni	1	864	fig|367737.5.peg.864	25.23	endonuclease/exonuclease/phosphatase
1	496	621	fig|28197.3.peg.496	hypothetical protein	uni	1	2198	fig|367737.5.peg.2198	26.32	hypothetical protein
1	497	675	fig|28197.3.peg.497	hypothetical protein	bi	1	2198	fig|367737.5.peg.2198	44.18	hypothetical protein
1	498	298	fig|28197.3.peg.498	Flagellin protein FlaA	bi	1	2199	fig|367737.5.peg.2199	77.52	flagellin
1	499	300	fig|28197.3.peg.499	Flagellin protein FlaA	bi	1	2200	fig|367737.5.peg.2200	76.05	flagellin
1	520	64	fig|28197.3.peg.520	hypothetical protein	-				0
1	521	147	fig|28197.3.peg.521	hypothetical protein	-				0
1	529	674	fig|28197.3.peg.529	TonB-dependent receptor	uni	1	333	fig|367737.5.peg.333	57.37	TonB-dependent receptor protein
1	530	125	fig|28197.3.peg.530	transcriptional regulator, AraC family	uni	1	1547	fig|367737.5.peg.1547	62.3	transcriptional regulator
1	531	147	fig|28197.3.peg.531	transcriptional regulator	bi	1	2229	fig|367737.5.peg.2229	75	transcriptional regulator
